# Supplementary material for: Overweight and obesity in Mexican children and adolescents during the last 25 years
Source: Nutr Diabetes. 2017 Mar 13;7(3):e247–. doi: 10.1038/nutd.2016.52 (PMC5380891; doi:10.1038/nutd.2016.52)
Supplement: Supplementary Table 1 [file nutd201652x1.pdf]

Supplementary table 1. Combined prevalence of risk of overweight, overweight and obesity by age group, sex, area of residency and household living conditions index (HLCI). Surveys 1988, 1999, 2006 and 2012. IOTF<sup>1,2,3,4,5</sup>

|                        |                       | 1988          |     |             |               |     |            | 1999          |      |              |               |     |             | 2006          |      |              |               |      |              | 2012          |      |              |               |      |              |
|------------------------|-----------------------|---------------|-----|-------------|---------------|-----|------------|---------------|------|--------------|---------------|-----|-------------|---------------|------|--------------|---------------|------|--------------|---------------|------|--------------|---------------|------|--------------|
|                        |                       | Overweight*   |     |             | Obesity       |     |            | Overweight*   |      |              | Obesity       |     |             | Overweight*   |      |              | Obesity       |      |              | Overweight*   |      |              | Obesity       |      |              |
| VARIABLE               |                       | n (Thousands) | %   | CI95%       | n (Thousands) | %   | CI95%      | n (Thousands) | %    | CI95%        | n (Thousands) | %   | CI95%       | n (Thousands) | %    | CI95%        | n (Thousands) | %    | CI95%        | n (Thousands) | %    | CI95%        | n (Thousands) | %    | CI95%        |
| Preschool-age children | <i>Boys and girls</i> |               |     |             |               |     |            |               |      |              |               |     |             |               |      |              |               |      |              |               |      |              |               |      |              |
| National               | Total                 | 501.3         | 6.1 | (5.3, 6.9)  | 176.9         | 2.1 | (1.7, 2.6) | 940.0         | 9.3  | (8.6, 9.9)   | 215.8         | 2.1 | (1.8, 2.5)  | 765.8         | 8.1  | (7.1, 9.3)   | 267.4         | 2.8  | (2.3, 3.3)   | 880.8         | 8.2  | (7.3, 9.0)   | 310.9         | 2.9  | (2.4, 3.4)   |
| Area                   | Urban                 | 367.4         | 5.6 | (4.9, 6.4)  | 122.0         | 1.9 | (1.4, 2.3) | 670.1         | 9.4  | (8.5, 10.2)  | 163.2         | 2.3 | (1.8, 2.7)  | 513.7         | 7.4  | (6.2, 8.7)   | 219.0         | 3.2  | (2.5, 3.8)   | 674.6         | 8.4  | (7.4, 9.4)   | 258.5         | 3.2  | (2.6, 3.9)   |
|                        | Rural                 | 133.9         | 7.7 | (5.5, 10.3) | 54.9          | 3.1 | (1.9, 4.9) | 269.9         | 9.0  | (8.0, 10.1)  | 52.6          | 1.8 | (1.3, 2.2)  | 252.2         | 10.2 | (8.2, 12.6)  | 48.4          | 2.0  | (1.4, 2.6)   | 206.2         | 7.5  | (6.4, 8.6)   | 52.4          | 1.9  | (1.4, 2.4)   |
| HLCI                   | Q1                    | 116.2         | 6.3 | (4.6, 8.4)  | 43.7          | 2.4 | (1.3, 4.0) | 210.4         | 9.4  | (8.4, 10.4)  | 32.1          | 1.4 | (1.0, 2.0)  | 214.4         | 9.3  | (7.2, 11.6)  | 42.0          | 1.8  | (1.2, 2.6)   | 220.6         | 10.2 | (8.4, 12.3)  | 40.6          | 1.9  | (1.2, 2.8)   |
|                        | Q2                    | 70.6          | 4.9 | (3.6, 6.3)  | 30.1          | 2.1 | (1.2, 3.3) | 201.3         | 10.6 | (9.1, 12.2)  | 34.4          | 1.8 | (1.1, 2.7)  | 165.2         | 7.3  | (5.8, 9.0)   | 64.1          | 2.8  | (2.0, 3.9)   | 134.4         | 6.4  | (5.1, 7.7)   | 44.7          | 2.1  | (1.2, 3.4)   |
|                        | Q3                    | 82.4          | 6.4 | (4.8, 8.5)  | 18.5          | 1.4 | (0.8, 2.5) | 168.4         | 8.0  | (6.6, 9.6)   | 44.8          | 2.1 | (1.6, 2.8)  | 141.3         | 7.7  | (5.9, 9.7)   | 53.0          | 2.9  | (1.9, 4.1)   | 167.7         | 7.7  | (6.3, 9.3)   | 84.0          | 3.9  | (2.6, 5.5)   |
|                        | Q4                    | 55.1          | 4.6 | (3.1, 6.5)  | 21.1          | 1.8 | (1.0, 2.9) | 166.1         | 9.2  | (7.5, 11.1)  | 42.1          | 2.3 | (1.5, 3.5)  | 133.5         | 7.7  | (4.8, 12.0)  | 75.4          | 4.3  | (2.8, 6.4)   | 160.6         | 6.9  | (5.4, 8.5)   | 60.8          | 2.6  | (1.7, 3.8)   |
|                        | Q5                    | 79.7          | 6.3 | (4.7, 8.3)  | 36.7          | 2.9 | (1.8, 4.3) | 176.7         | 9.6  | (7.8, 11.6)  | 54.5          | 3.0 | (2.1, 4.1)  | 106.6         | 8.8  | (6.3, 12.1)  | 32.5          | 2.7  | (1.6, 4.3)   | 197.5         | 9.9  | (7.5, 12.9)  | 80.9          | 4.1  | (2.6, 6.2)   |
| School-age children    | <i>Girls</i>          |               |     |             |               |     |            |               |      |              |               |     |             |               |      |              |               |      |              |               |      |              |               |      |              |
| National               | Total                 |               |     |             |               |     |            | 1128.5        | 14.3 | (13.2, 15.3) | 455.2         | 5.8 | (5.0, 6.5)  | 1428.5        | 18.0 | (16.6, 19.5) | 678.0         | 8.6  | (7.4, 9.7)   | 1493.3        | 18.3 | (17.0, 19.7) | 651.3         | 8.0  | (7.1, 8.8)   |
| Area                   | Urban                 |               |     |             |               |     |            | 884.3         | 16.4 | (14.9, 17.8) | 385.5         | 7.1 | (6.1, 8.2)  | 1095.2        | 19.2 | (17.4, 21.1) | 607.3         | 10.7 | (9.2, 12.2)  | 1223.6        | 20.0 | (18.3, 21.7) | 535.0         | 8.8  | (7.7, 9.8)   |
|                        | Rural                 |               |     |             |               |     |            | 244.2         | 9.8  | (8.7, 10.8)  | 69.7          | 2.8 | (2.2, 3.4)  | 333.2         | 15.0 | (12.7, 17.6) | 70.7          | 3.2  | (2.4, 4.0)   | 269.7         | 13.2 | (11.5, 15.0) | 116.4         | 5.7  | (4.7, 6.8)   |
| HLCI                   | Q1                    |               |     |             |               |     |            | 129.4         | 7.4  | (6.2, 8.7)   | 20.3          | 1.2 | (0.8, 1.6)  | 239.6         | 11.5 | (9.5, 13.7)  | 81.9          | 3.9  | (2.8, 5.3)   | 184.6         | 12.0 | (9.9, 14.4)  | 82.4          | 5.4  | (4.0, 7.0)   |
|                        | Q2                    |               |     |             |               |     |            | 165.2         | 11.6 | (9.5, 14.1)  | 56.6          | 4.0 | (2.7, 5.7)  | 295.4         | 16.6 | (14.0, 19.4) | 172.1         | 9.7  | (7.2, 12.7)  | 261.4         | 16.2 | (13.6, 19.0) | 86.8          | 5.4  | (4.2, 6.7)   |
|                        | Q3                    |               |     |             |               |     |            | 242.0         | 15.1 | (12.7, 17.7) | 134.6         | 8.4 | (6.8, 10.2) | 284.0         | 19.7 | (16.6, 23.1) | 156.4         | 10.8 | (8.7, 13.3)  | 307.9         | 19.1 | (16.2, 22.2) | 136.2         | 8.4  | (6.7, 10.4)  |
|                        | Q4                    |               |     |             |               |     |            | 267.7         | 19.0 | (16.3, 21.9) | 91.9          | 6.5 | (5.1, 8.1)  | 308.3         | 22.5 | (19.2, 26.1) | 138.3         | 10.1 | (8.0, 12.5)  | 355.7         | 19.8 | (16.8, 23.0) | 167.6         | 9.3  | (7.3, 11.7)  |
|                        | Q5                    |               |     |             |               |     |            | 305.1         | 19.7 | (16.7, 22.9) | 150.8         | 9.7 | (7.4, 12.6) | 295.5         | 24.3 | (19.2, 30.2) | 129.0         | 10.6 | (7.6, 14.4)  | 383.7         | 24.2 | (20.4, 28.4) | 178.4         | 11.3 | (9.0, 13.9)  |
|                        | <i>Boys</i>           |               |     |             |               |     |            |               |      |              |               |     |             |               |      |              |               |      |              |               |      |              |               |      |              |
| National               | Total                 |               |     |             |               |     |            | 888.0         | 11.7 | (10.7, 12.7) | 379.8         | 5.0 | (4.3, 5.7)  | 1288.9        | 16.5 | (15.0, 17.9) | 698.8         | 8.9  | (7.9, 9.9)   | 1366.2        | 16.3 | (15.0, 17.5) | 829.9         | 9.9  | (8.7, 11.0)  |
| Area                   | Urban                 |               |     |             |               |     |            | 720.2         | 13.7 | (12.3, 15.0) | 330.5         | 6.3 | (5.3, 7.3)  | 1045.8        | 18.5 | (16.7, 20.4) | 594.3         | 10.5 | (9.3, 11.8)  | 1108.9        | 17.8 | (16.2, 19.4) | 703.2         | 11.3 | (9.8, 12.8)  |
|                        | Rural                 |               |     |             |               |     |            | 167.8         | 7.2  | (5.9, 8.7)   | 49.2          | 2.1 | (1.6, 2.7)  | 243.1         | 11.1 | (9.3, 13.1)  | 104.5         | 4.8  | (3.7, 6.0)   | 257.3         | 11.9 | (10.3, 13.5) | 126.8         | 5.9  | (4.7, 7.2)   |
| HLCI                   | Q1                    |               |     |             |               |     |            | 76.7          | 4.6  | (3.3, 6.2)   | 22.3          | 1.3 | (0.8, 2.1)  | 231.3         | 11.7 | (9.3, 14.5)  | 76.5          | 3.9  | (2.8, 5.1)   | 178.1         | 11.0 | (8.9, 13.3)  | 74.2          | 4.6  | (3.0, 6.7)   |
|                        | Q2                    |               |     |             |               |     |            | 135.3         | 10.0 | (8.3, 11.8)  | 33.1          | 2.4 | (1.6, 3.5)  | 288.8         | 16.5 | (13.4, 20.0) | 130.6         | 7.4  | (5.9, 9.3)   | 219.8         | 14.4 | (12.2, 16.8) | 134.1         | 8.8  | (6.5, 11.6)  |
|                        | Q3                    |               |     |             |               |     |            | 197.0         | 12.5 | (10.4, 14.9) | 86.8          | 5.5 | (3.6, 8.2)  | 242.7         | 16.5 | (14.1, 19.2) | 145.4         | 9.9  | (8.0, 12.0)  | 276.3         | 16.7 | (14.0, 19.6) | 173.9         | 10.5 | (8.5, 12.7)  |
|                        | Q4                    |               |     |             |               |     |            | 228.1         | 15.7 | (13.2, 18.4) | 100.2         | 6.9 | (5.3, 8.8)  | 307.3         | 19.9 | (16.8, 23.4) | 217.5         | 14.1 | (11.0, 17.7) | 366.7         | 20.9 | (18.0, 24.0) | 190.1         | 10.8 | (8.7, 13.3)  |
|                        | Q5                    |               |     |             |               |     |            | 235.2         | 17.3 | (14.5, 20.4) | 131.5         | 9.7 | (7.9, 11.7) | 217.1         | 20.4 | (16.1, 25.4) | 126.1         | 11.9 | (8.9, 15.6)  | 325.2         | 17.7 | (14.8, 20.8) | 257.6         | 14.0 | (10.9, 17.6) |
|                        | Boys and girls        |               |     |             |               |     |            | 2016.5        | 13.0 | (12.3, 13.7) | 835.0         | 5.4 | (4.8, 5.9)  | 2717.4        | 17.3 | (16.2, 18.3) | 1376.8        | 8.7  | (7.9, 9.5)   | 2859.4        | 17.3 | (16.3, 18.2) | 1481.3        | 8.9  | (8.2, 9.7)   |
| Adolescents            | <i>Women</i>          |               |     |             |               |     |            |               |      |              |               |     |             |               |      |              |               |      |              |               |      |              |               |      |              |
| National               | Total                 | 441.5         | 7.6 | (6.7, 8.5)  | 97.6          | 1.7 | (1.2, 2.2) | 1600.9        | 21.1 | (19.8, 22.4) | 350.8         | 4.6 | (4.0, 5.2)  | 2018.6        | 22.0 | (20.6, 23.5) | 790.6         | 8.6  | (7.5, 9.8)   | 1984.8        | 21.9 | (20.3, 23.5) | 911.3         | 10.1 | (8.9, 11.2)  |
| Area                   | Urban                 | 390.2         | 8.2 | (7.2, 9.2)  | 90.9          | 1.9 | (1.4, 2.5) | 1225.0        | 22.6 | (20.9, 24.4) | 286.1         | 5.3 | (4.5, 6.1)  | 1561.1        | 23.4 | (21.6, 25.1) | 671.6         | 10.1 | (8.7, 11.6)  | 1557.5        | 23.1 | (21.1, 25.1) | 765.5         | 11.4 | (9.9, 12.9)  |
|                        | Rural                 | 51.4          | 5.1 | (3.5, 7.3)  | 6.7           | 0.7 | (0.2, 1.7) | 375.9         | 17.3 | (15.8, 18.9) | 64.7          | 3.0 | (2.2, 3.8)  | 457.5         | 18.4 | (15.9, 21.1) | 119.0         | 4.8  | (3.6, 6.2)   | 427.4         | 18.4 | (16.4, 20.6) | 145.8         | 6.3  | (5.2, 7.5)   |
| HLCI                   | Q1                    | 73.4          | 6.6 | (4.8, 9.0)  | 2.0           | 0.2 | (0.0, 0.5) | 224.8         | 16.0 | (14.1, 18.0) | 13.2          | 0.9 | (0.5, 1.5)  | 327.1         | 16.3 | (13.7, 19.2) | 90.5          | 4.5  | (3.3, 6.0)   | 279.2         | 18.6 | (15.8, 21.6) | 95.7          | 6.4  | (4.9, 8.1)   |
|                        | Q2                    | 90.2          | 7.9 | (6.0, 10.2) | 21.7          | 1.9 | (1.0, 3.3) | 268.8         | 20.8 | (18.0, 23.7) | 41.4          | 3.2 | (2.5, 4.0)  | 505.1         | 25.7 | (22.8, 28.8) | 179.6         | 9.1  | (7.1, 11.6)  | 396.4         | 22.9 | (19.7, 26.4) | 145.7         | 8.4  | (6.7, 10.4)  |
|                        | Q3                    | 89.9          | 6.8 | (5.1, 8.8)  | 25.4          | 1.9 | (1.1, 3.1) | 302.5         | 19.4 | (17.2, 21.8) | 98.9          | 6.4 | (5.1, 7.8)  | 431.0         | 23.3 | (20.1, 26.8) | 189.1         | 10.2 | (7.7, 13.4)  | 385.1         | 21.7 | (18.6, 25.1) | 206.4         | 11.6 | (9.0, 14.9)  |
|                        | Q4                    | 81.7          | 9.1 | (7.0, 11.8) | 15.2          | 1.7 | (0.8, 3.3) | 323.3         | 24.3 | (21.1, 27.6) | 101.5         | 7.6 | (5.7, 9.9)  | 390.5         | 22.4 | (19.1, 26.1) | 175.7         | 10.1 | (7.7, 13.0)  | 423.5         | 22.5 | (19.1, 26.1) | 229.0         | 12.2 | (9.9, 14.7)  |
|                        | Q5                    | 81.7          | 7.7 | (5.9, 9.8)  | 29.4          | 2.8 | (1.6, 4.6) | 448.2         | 24.8 | (21.0, 28.9) | 91.2          | 5.0 | (3.8, 6.5)  | 359.7         | 23.2 | (19.0, 27.9) | 151.1         | 9.7  | (7.3, 12.7)  | 500.7         | 23.0 | (19.9, 26.4) | 234.5         | 10.8 | (8.6, 13.2)  |
|                        | <i>Men</i>            |               |     |             |               |     |            |               |      |              |               |     |             |               |      |              |               |      |              |               |      |              |               |      |              |
| National               | Total                 |               |     |             |               |     |            |               |      |              |               |     |             | 1847.2        | 20.2 | (18.6, 21.7) | 880.1         | 9.6  | (8.0, 11.3)  | 1927.0        | 20.9 | (19.3, 22.4) | 1037.2        | 11.2 | (10.1, 12.4) |
| Area                   | Urban                 |               |     |             |               |     |            |               |      |              |               |     |             | 1441.7        | 21.0 | (19.2, 22.8) | 746.8         | 10.9 | (8.9, 13.1)  | 1550.6        | 21.9 | (20.1, 23.8) | 905.6         | 12.8 | (11.4, 14.2) |
|                        | Rural                 |               |     |             |               |     |            |               |      |              |               |     |             | 405.5         | 17.7 | (15.0, 20.6) | 133.2         | 5.8  | (4.5, 7.4)   | 376.4         | 17.3 | (15.3, 19.4) | 131.6         | 6.1  | (4.8, 7.5)   |
| HLCI                   | Q1                    |               |     |             |               |     |            |               |      |              |               |     |             | 298.9         | 15.4 | (12.7, 18.3) | 77.3          | 4.0  | (2.8, 5.4)   | 228.2         | 14.6 | (12.0, 17.6) | 89.2          | 5.7  | (3.8, 8.4)   |
|                        | Q2                    |               |     |             |               |     |            |               |      |              |               |     |             | 366.5         | 20.0 | (17.1, 23.2) | 142.9         | 7.8  | (6.1, 9.8)   | 294.1         | 18.6 | (15.6, 21.9) | 123.7         | 7.8  | (5.7, 10.4)  |
|                        | Q3                    |               |     |             |               |     |            |               |      |              |               |     |             | 350.4         | 20.1 | (17.0, 23.6) | 186.9         | 10.7 | (8.0, 14.1)  | 374.8         | 20.7 | (17.5, 24.1) | 167.7         | 9.2  | (7.3, 11.4)  |
|                        | Q4                    |               |     |             |               |     |            |               |      |              |               |     |             | 400.8         | 22.0 | (18.9, 25.2) | 218.8         | 12.0 | (9.5, 14.9)  | 499.7         | 24.0 | (20.9, 27.3) | 314.7         | 15.1 | (12.4, 18.2) |
|                        | Q5                    |               |     |             |               |     |            |               |      |              |               |     |             | 428.4         | 23.9 | (19.8, 28.4) | 252.6         | 14.1 | (8.6, 22.1)  | 530.2         | 24.0 | (20.3, 28.1) | 341.9         | 15.5 | (12.8, 18.5) |
|                        | Men and women         |               |     |             |               |     |            |               |      |              |               |     |             | 3865.8        | 21.1 | (20.0, 22.2) | 1670.7        | 9.1  | (8.1, 10.1)  | 3911.9        | 21.4 | (20.2, 22.5) | 1948.5        | 10.6 | (9.8, 11.4)  |

<sup>1</sup> Percentage and 95% confidence interval (CI).<sup>2</sup> IOTF= International Obesity Task Force<sup>3</sup> Overweight and Obesity definition using International cut off points for body mass index for overweight and obesity by sex between 2 and 18 years (Cole T, Bellizzi M. Establishing a standard definition for child overweight and obesity worldwide: international survey. BMJ 2000;320:1-6)<sup>4</sup> Age groups defined as: preschoolers: 2-4 years; school-age children: 5-11 years; and adolescents: 12-19 years.<sup>5</sup> No data available for school-age children in 1988<sup>6</sup> HLCI, Household living condition index<sup>7</sup> Q, Quintile
